# Supplementary material for: Associations of Housing First Configuration and Crime and Social Connectedness Among Persons With Chronic Homelessness Histories
Source: Atypon-hosted journal article supplement (doi:10.1176/appi.ps.201500446), 2016-06-01
Supplement: appi.ps.201500446.ds001.pdf [file appi.ps.201500446.ds001.pdf]

## Supplementary Table 1

## STROBE Statement for reports of cohort studies

|                              | <b>Item<br/>No</b> | <b>Recommendation</b>                                                                                                                                                                | <b>Page</b>                             |
|------------------------------|--------------------|--------------------------------------------------------------------------------------------------------------------------------------------------------------------------------------|-----------------------------------------|
| Title and abstract           | 1                  | (a) Indicate the study's design with a commonly used term in the title or the abstract                                                                                               | 2                                       |
|                              |                    | (b) Provide in the abstract an informative and balanced summary of what was done and what was found                                                                                  | 2                                       |
| <b>Introduction</b>          |                    |                                                                                                                                                                                      |                                         |
| Background/<br>rationale     | 2                  | Explain the scientific background and rationale for the investigation being reported                                                                                                 | 3-5                                     |
| Objectives                   | 3                  | State specific objectives, including any prespecified hypotheses                                                                                                                     | 4-5                                     |
| <b>Methods</b>               |                    |                                                                                                                                                                                      |                                         |
| Study design                 | 4                  | Present key elements of study design early in the paper                                                                                                                              | 5                                       |
| Setting                      | 5                  | Describe the setting, locations, and relevant dates, including periods of recruitment, exposure, follow-up, and data collection                                                      | 5-6                                     |
| Participants                 | 6                  | (a) Give the eligibility criteria, and the sources and methods of selection of participants. Describe methods of follow-up                                                           | 5-6,<br>Supplementary<br>Figure 1 and 3 |
|                              |                    | (b) For matched studies, give matching criteria and number of exposed and unexposed                                                                                                  | N/A                                     |
| Variables                    | 7                  | Clearly define all outcomes, exposures, predictors, potential confounders, and effect modifiers. Give diagnostic criteria, if applicable                                             | 6-7                                     |
| Data sources/<br>measurement | 8*                 | For each variable of interest, give sources of data and details of methods of assessment (measurement). Describe comparability of assessment methods if there is more than one group | 6-7                                     |

|                        |     |                                                                                                                                                                                                   |                                    |
|------------------------|-----|---------------------------------------------------------------------------------------------------------------------------------------------------------------------------------------------------|------------------------------------|
| Bias                   | 9   | Describe any efforts to address potential sources of bias                                                                                                                                         | 7-8                                |
| Study size             | 10  | Explain how the study size was arrived at                                                                                                                                                         | 5, 12                              |
| Quantitative variables | 11  | Explain how quantitative variables were handled in the analyses. If applicable, describe which groupings were chosen and why                                                                      | 7-8                                |
| Statistical methods    | 12  | (a) Describe all statistical methods, including those used to control for confounding                                                                                                             | 7-8                                |
|                        |     | (b) Describe any methods used to examine subgroups and interactions                                                                                                                               | N/A                                |
|                        |     | (c) Explain how missing data were addressed                                                                                                                                                       | 7-8                                |
|                        |     | (d) If applicable, explain how loss to follow-up was addressed                                                                                                                                    | 7-8                                |
|                        |     | (e) Describe any sensitivity analyses                                                                                                                                                             | N/A                                |
| <b>Results</b>         |     |                                                                                                                                                                                                   |                                    |
| Participants           | 13* | (a) Report numbers of individuals at each stage of study—eg numbers potentially eligible, examined for eligibility, confirmed eligible, included in the study, completing follow-up, and analysed | Supplementary Figure 2             |
|                        |     | (b) Give reasons for non-participation at each stage                                                                                                                                              | Supplementary Figure 2             |
|                        |     | (c) Consider use of a flow diagram                                                                                                                                                                | Supplementary Figure 2             |
| Descriptive data       | 14* | (a) Give characteristics of study participants (eg demographic, clinical, social) and information on exposures and potential confounders                                                          | 8                                  |
|                        |     | (b) Indicate number of participants with missing data for each variable of interest                                                                                                               | 8,<br>Supplementary Tables 2 and 3 |
|                        |     | (c) Summarise follow-up time (eg, average and                                                                                                                                                     | 6                                  |

total amount)

|                          |     |                                                                                                                                                                                                              |                                               |
|--------------------------|-----|--------------------------------------------------------------------------------------------------------------------------------------------------------------------------------------------------------------|-----------------------------------------------|
| Outcome data             | 15* | Report numbers of outcome events or summary measures over time                                                                                                                                               | 8-9                                           |
| Main results             | 16  | (a) Give unadjusted estimates and, if applicable, confounder-adjusted estimates and their precision (eg, 95% confidence interval). Make clear which confounders were adjusted for and why they were included | 8-9, Tables 1-2, Supplementary Tables 2 and 3 |
|                          |     | (b) Report category boundaries when continuous variables were categorized                                                                                                                                    | Tables 1-2, Supplementary Tables 2 and 3      |
|                          |     | (c) If relevant, consider translating estimates of relative risk into absolute risk for a meaningful time period                                                                                             | N/A                                           |
| Other analyses           | 17  | Report other analyses done—eg analyses of subgroups and interactions, and sensitivity analyses                                                                                                               | N/A                                           |
| <b>Discussion</b>        |     |                                                                                                                                                                                                              |                                               |
| Key results              | 18  | Summarise key results with reference to study objectives                                                                                                                                                     | 10-13                                         |
| Limitations              | 19  | Discuss limitations of the study, taking into account sources of potential bias or imprecision. Discuss both direction and magnitude of any potential bias                                                   | 12                                            |
| Interpretation           | 20  | Give a cautious overall interpretation of results considering objectives, limitations, multiplicity of analyses, results from similar studies, and other relevant evidence                                   | 10-13                                         |
| Generalisability         | 21  | Discuss the generalisability (external validity) of the study results                                                                                                                                        | 12-13                                         |
| <b>Other information</b> |     |                                                                                                                                                                                                              |                                               |
| Funding                  | 22  | Give the source of funding and the role of the funders for the present study and, if applicable, for the original study on which the present article is based                                                | 8                                             |

Supplementary Figure 1

Flowchart of recruitment process for client survey participants

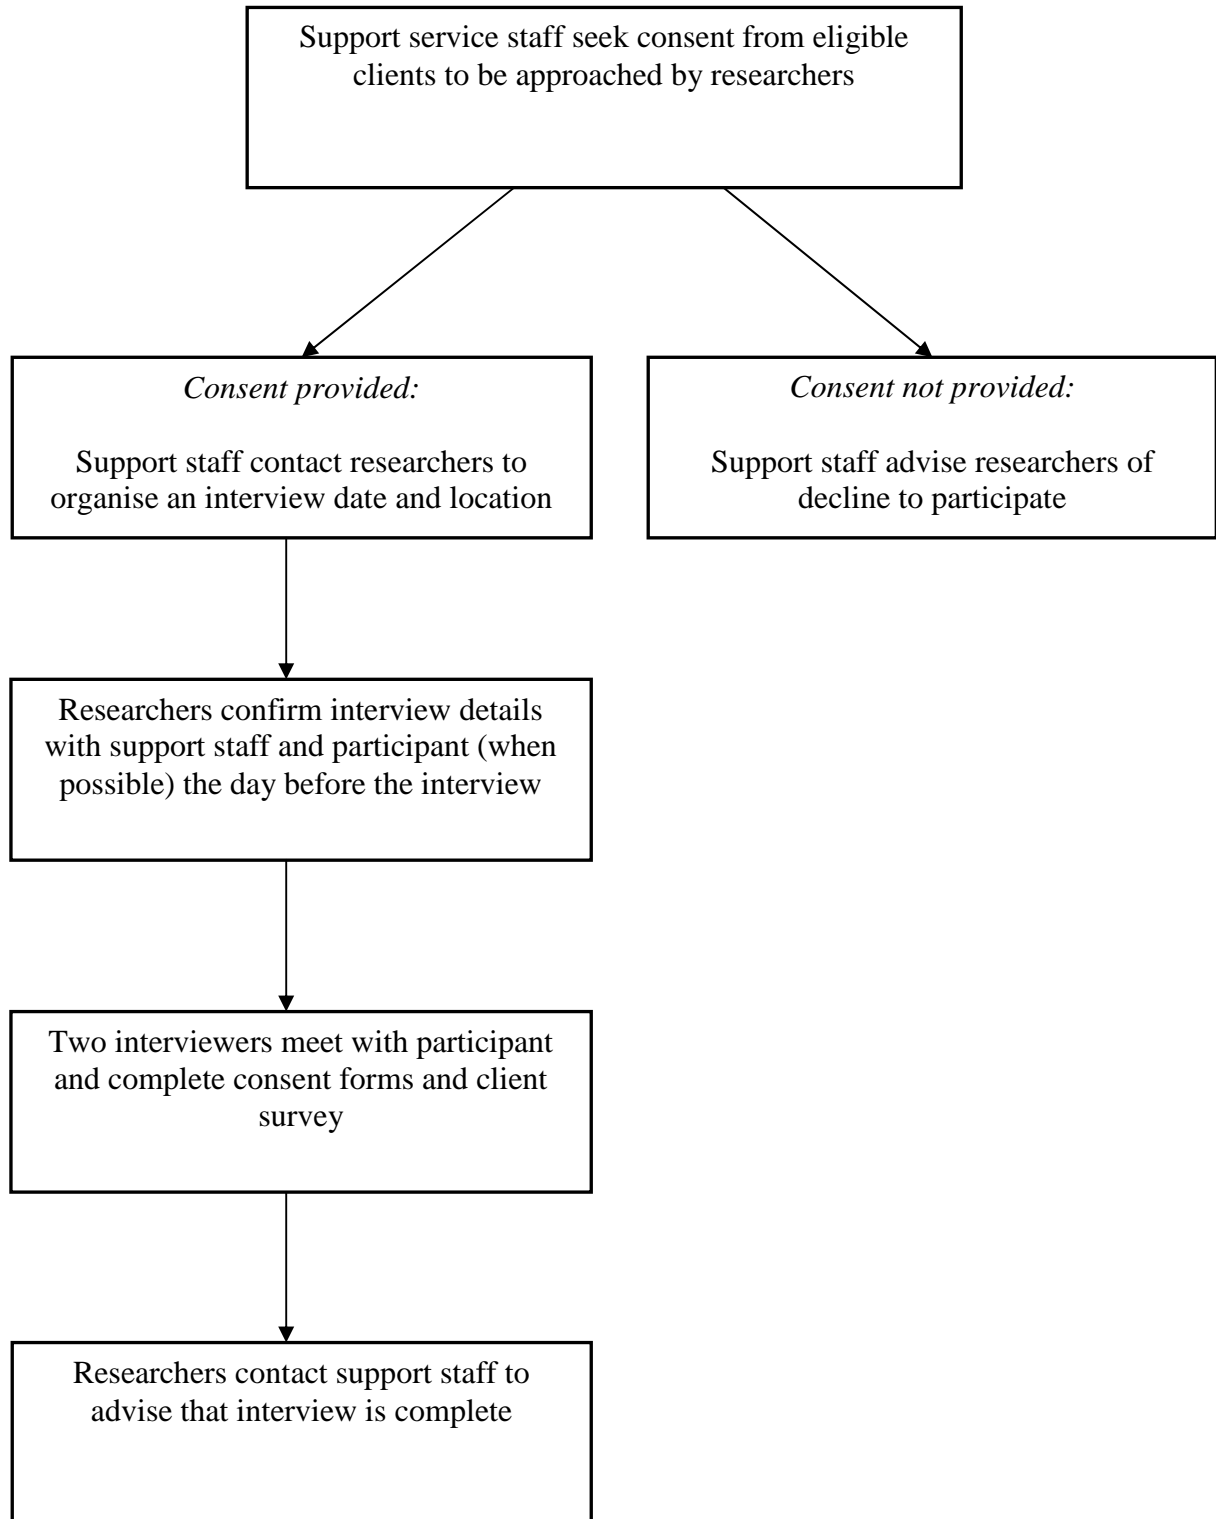

Supplementary Figure 2

Flowchart of baseline recruitment and 12-month follow-up

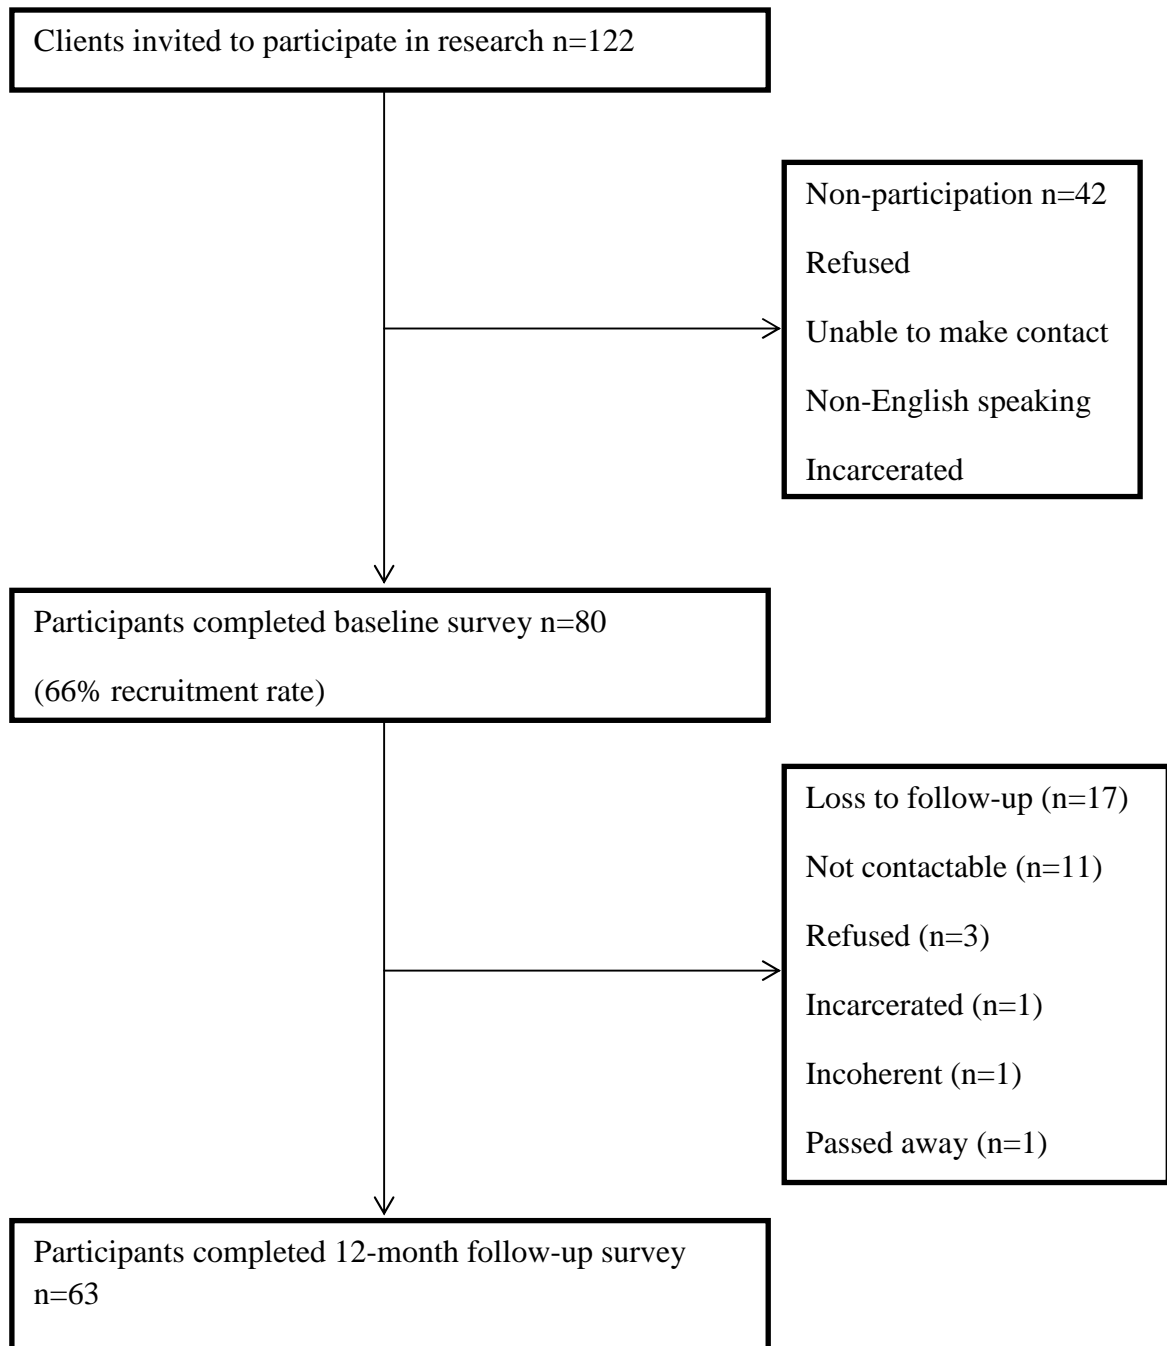

Supplementary Figure 3

Flowchart of follow-up process

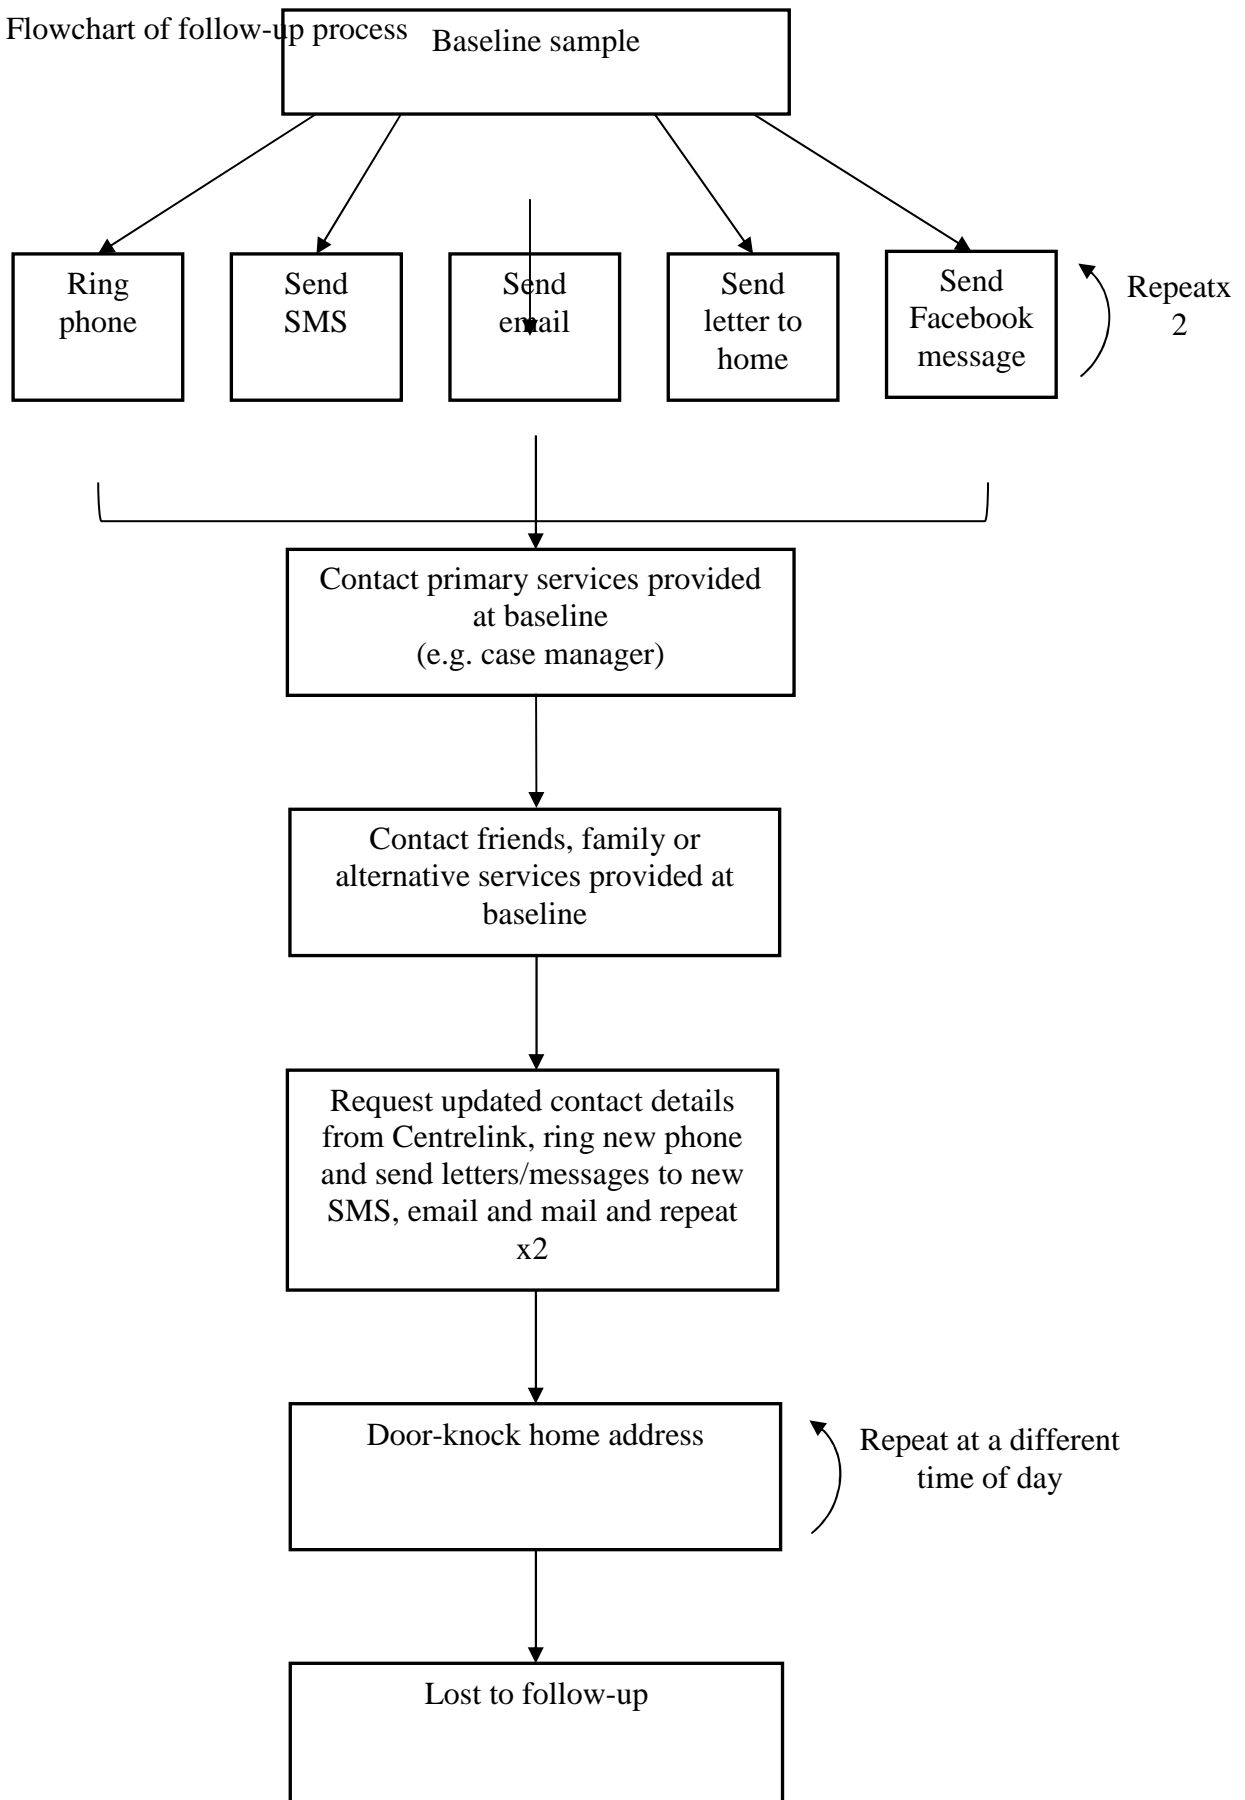

Supplementary Table 2

Self-reported contact with criminal justice system channels in the previous 12 months by housing configuration group (SS vs CS) (n=59)

| Outcome            | Baseline |    | Follow-up |    | Change | 95% CI    | Adjusted odds ratio <sup>a</sup> | 95% CI       |
|--------------------|----------|----|-----------|----|--------|-----------|----------------------------------|--------------|
|                    | N        | %  | N         | %  |        |           |                                  |              |
| Stopped on street  |          |    |           |    |        |           | 1.0                              | 1.0 to 1.0   |
| SS                 | 37       | 68 | 37        | 65 | -3     | -21 to 16 |                                  |              |
| CS                 | 21       | 48 | 21        | 62 | 14     | -7 to 36  |                                  |              |
| Held overnight     |          |    |           |    |        |           | 5.8                              | .8 to 41.0   |
| SS                 | 37       | 14 | 37        | 5  | -9     | -17 to 1  |                                  |              |
| CS                 | 22       | 14 | 22        | 23 | 9      | -14 to 32 |                                  |              |
| Attended court     |          |    |           |    |        |           | 19.8*                            | 1.9 to 204.2 |
| SS                 | 37       | 32 | 37        | 14 | -18    | -34 to -4 |                                  |              |
| CS                 | 22       | 27 | 22        | 41 | 14     | -2 to 29  |                                  |              |
| Adult prison       |          |    |           |    |        |           |                                  | #            |
| SS                 | 37       | 5  | 37        | 3  | -2     | -12 to 7  |                                  |              |
| CS                 | 22       | 0  | 22        | 5  | 5      | -5 to 14  |                                  |              |
| Parole supervision |          |    |           |    |        |           |                                  | #            |
| SS                 | 37       | 16 | 37        | 3  | -13    | -25 to -2 |                                  |              |
| CS                 | 22       | 5  | 22        | 5  | 0      | -5 to 5   |                                  |              |

\*  $p < .05$ .

<sup>a</sup> Adjusted for baseline housing duration and baseline score.

<sup>#</sup> Not estimated due to low number of events

SS, scatter site; CS, congregated site; n, number; CI, Confidence Interval.

Supplementary Table 3

Self-reported social connections according to housing configuration group (n=58)

| Outcome                 | Baseline |     | Follow-up |    | Change | 95% CI    | Adjusted odds ratio <sup>a</sup> | 95% CI      |
|-------------------------|----------|-----|-----------|----|--------|-----------|----------------------------------|-------------|
|                         | N        | %   | N         | %  |        |           |                                  |             |
| Case manager            |          |     |           |    |        |           | 10.9*                            | 1.2 to 96.1 |
| SS                      | 34       | 88  | 34        | 68 | -20    | -41 to 0  |                                  |             |
| CS                      | 24       | 100 | 24        | 96 | -4     | -13 to 4  |                                  |             |
| Regular family contact  |          |     |           |    |        |           | .3                               | .0 to 1.4   |
| SS                      | 29       | 41  | 29        | 45 | 4      | -15 to 22 |                                  |             |
| CS                      | 18       | 33  | 18        | 22 | -11    | -35 to 12 |                                  |             |
| Regular social contact  |          |     |           |    |        |           | .1                               | .0 to 1.2   |
| SS                      | 29       | 97  | 29        | 97 | 0      | -10 to 10 |                                  |             |
| CS                      | 18       | 78  | 18        | 78 | 0      | -24 to 24 |                                  |             |
| Problems with friends   |          |     |           |    |        |           | 2.3                              | .5 to 9.5   |
| SS                      | 27       | 22  | 27        | 33 | 11     | -6 to 28  |                                  |             |
| CS                      | 17       | 41  | 17        | 53 | 12     | -24 to 48 |                                  |             |
| Mixing with bad company |          |     |           |    |        |           | .4                               | .1 to 2.1   |
| SS                      | 27       | 41  | 27        | 33 | -8     | -36 to 21 |                                  |             |
| CS                      | 18       | 44  | 18        | 17 | -28    | -56 to 0  |                                  |             |
| Boredom                 |          |     |           |    |        |           | 1.4                              | .2 to 10.6  |
| SS                      | 27       | 56  | 27        | 70 | 14     | 0 to 29   |                                  |             |
| CS                      | 18       | 56  | 18        | 67 | 11     | -12 to 35 |                                  |             |
| Loneliness              |          |     |           |    |        |           | .8                               | .1 to 4.1   |
| SS                      | 27       | 48  | 27        | 56 | 8      | -11 to 26 |                                  |             |
| CS                      | 18       | 61  | 18        | 50 | -11    | -35 to 12 |                                  |             |
| Losing temper           |          |     |           |    |        |           | .6                               | .1 to 2.5   |
| SS                      | 27       | 48  | 27        | 41 | -7     | -29 to 14 |                                  |             |
| CS                      | 18       | 61  | 18        | 33 | -28    | -51 to -5 |                                  |             |

\* $p < .05$ .<sup>a</sup> Adjusted for baseline housing duration and baseline score.

SS, scatter site; CS, congregated site; QOL, Quality of Life; n, number; M, Mean; SD, Standard Deviation; CI, Confidence Interval.
